# Supplementary material for: The tactile receptive fields of freely moving Caenorhabditis elegans nematodes
Source: Royal Society of Chemistry journal article supplement (doi:10.1039/c8ib00045j), 2018-06-27
Supplement: c8ib00045j1.pdf [file c8ib00045j1.pdf]

**Movie 1. HAWK applies controlled, targeted stimuli to freely moving worms.** A series of compiled videos shows four distinct trials delivered on anterior and posterior targets. Frames with the green dot are during the stimulus application. Movie frame rate is 10 fps. Frames are captured at approximately 10 fps, with delays during large stage translations at the beginning and end of stimulus application.
